# Supplementary material for: Electrokinetically operated microfluidic devices for integrated immunoaffinity monolith extraction and electrophoretic separation of preterm birth biomarkers
Source: Royal Society of Chemistry journal article supplement (doi:10.1039/c7an01357d), 2017-11-03
Supplement: c7an01357d1.pdf [file c7an01357d1.pdf]

**Electronic Supporting Information (ESI) for:**

**Electrokinetically Operated Microfluidic Devices for Integrated**

**Immunoaffinity Monolith Extraction and Electrophoretic Separation of**

**Preterm Birth Biomarkers**

Mukul Sonker, Ellen K. Parker, Anna V. Nielsen, Vishal Sahore, and Adam T. Woolley\*

Department of Chemistry and Biochemistry, Brigham Young University, Provo, UT 84602, USA

**Dot-Blot Test Protocol:** First, 10  $\mu$ L of analyte solution was dotted on nitrocellulose paper (see the Figure S1 caption for the amount of protein). After drying the dot, a blocking step was performed using 5% milk in 10 $\times$  Tris buffer saline (TBS) for 1 h to block other sites. Then, the paper was washed thoroughly using TBS plus 0.1% Tween 20 (TBST) for 15 min. Next, 2 mL of 10  $\mu$ g/mL antibody solution was added to the nitrocellulose paper, which was sealed in a plastic bag and left overnight for incubation on an electric rotor at 4  $^{\circ}$ C. Then, the paper was washed again using TBST for 15 min, and 2 mL of 1  $\mu$ g/mL secondary antibody was added to it and incubated for 1 h. Then, the paper was washed again with TBST for 15 min. Finally, scans of dot blots were taken using a LI-COR ODYSSEY imaging system (Lincoln, NE).

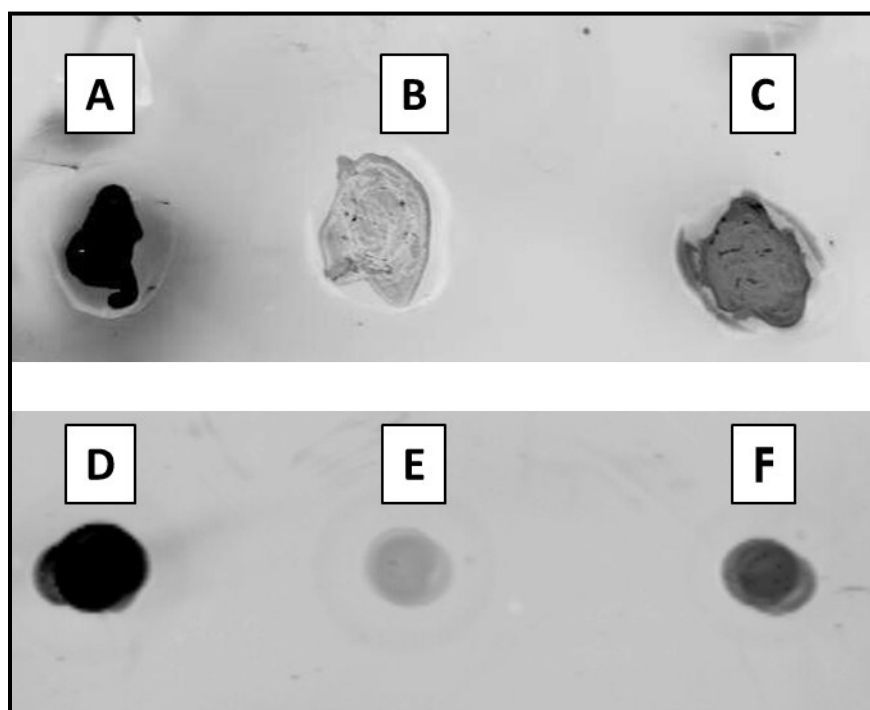

**Figure S1:** Dot blots. (A) LF (2  $\mu$ g), (B) serum diluted 100 $\times$  in TBS, and (C) serum spiked with 0.2  $\mu$ g LF, all incubated with anti-LF. (D) Fer (10  $\mu$ g), (E) serum diluted 100 $\times$  in TBS, and (F) serum spiked with 1  $\mu$ g Fer, all incubated with anti-Fer.

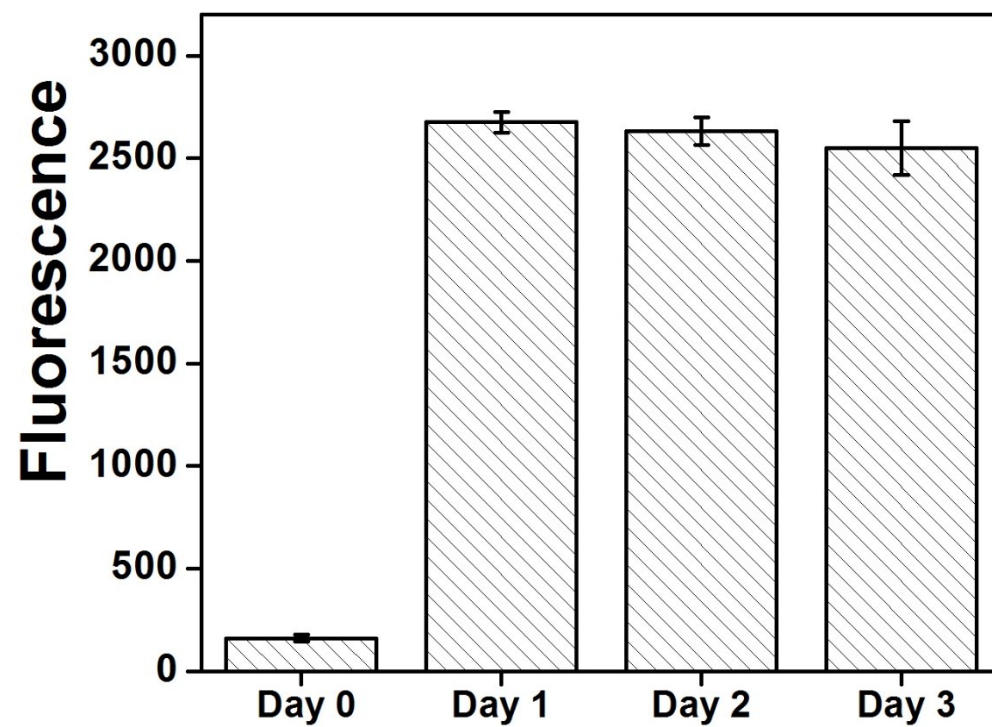

**Figure S2:** Effect of repeating immobilization of anti-Fer (2 mg/mL) on the same GMA-EGDMA column for three consecutive days (n=3).
